# Supplementary material for: Street Guide as a Literary Genre: La Manada City
Source: Preprints.org preprint supplement (doi:10.20944/preprints202304.0731.v1), 2023-04-23
Supplement: Supplementary file 1 [file supplementary]

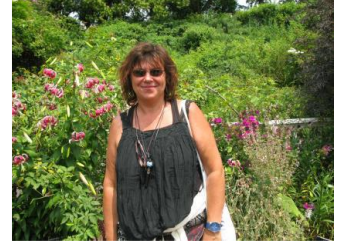

I, as Inma la Inmunda©

declare

that I am aware of the manuscript to be submitted to the journal *Preprints*.

It is a pleasure for me that the authors of the article "Street guide as a literary genre: *La Manada City*" use the images of my artwork that they want to illustrate their research.

I have given them permission for their use in this publication.

In Seville, April 21th, 2023.

Inma la Inmunda
